# Supplementary material for: An electrochemical deoxyribonucleic acid biosensor for rapid genotoxicity screening of chemicals
Source: Royal Society of Chemistry journal article supplement (doi:10.1039/c5ay00020c), 2015-01-01
Supplement: c5ay00020c1.pdf [file c5ay00020c1.pdf]

## Supporting information

### Electrochemical Deoxyribonucleic Acid Biosensor for Rapid Genotoxicity Screening of Chemicals

Lidong Wu<sup>‡2</sup>, Xianbo Lu<sup>\*‡1</sup>, Xue Wang<sup>1</sup>, Yi Song<sup>2</sup>, Jiping Chen<sup>\*1</sup>

1. Key Laboratory of Separation Science for Analytical Chemistry, Dalian Institute of Chemical Physics, Chinese Academy of Sciences, Dalian 116023, China

2. Chinese Academy of Fishery Sciences, Beijing 100141, China

**The chemical structure:**

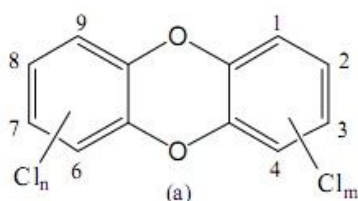

PCDD (Including 1,2,3,4,7,8-HxCDD and 1,2,3,6,7,8-HxCDD)

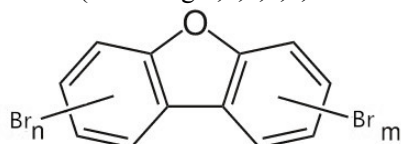

PBrDD (Including 2,3,7,8-TBrDF and 2,3,4,7,8-PeBrDF)

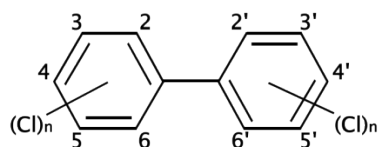

PCB (Including 3,3',4,4'-TePCB and 3,3',4,4',5,5'-HxPCB)

---

<sup>‡</sup>the authors contribute equally to this work.

\*Corresponding author. Tel/Fax: 86-411-84379562; E-mail: xianbolu@dicp.ac.cn,  
chenjp@dicp.ac.cn.

<sup>‡</sup>the authors contribute equally to this work.

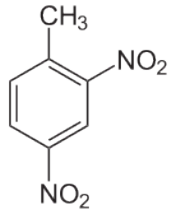

2,4-dinitrotoluene

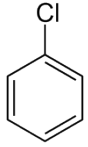

Chlorobenzene

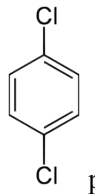

p-dichlorobenzene

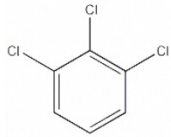

1,2,3-trichlorobenzene

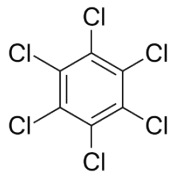

hexachlorobenzene
